# Supplementary material for: Semaphorin 4D in human head and neck cancer tissue and peripheral blood: A dense fibrotic peri-tumoral stromal phenotype
Source: PubMed Central journal article supplement (PMC5834246; doi:10.18632/oncotarget.24277), 2018-01-19
Supplement: oncotarget-09-11126-s001.pdf [file oncotarget-09-11126-s001.pdf]

# Semaphorin 4D in human head and neck cancer tissue and peripheral blood: A dense fibrotic peri-tumoral stromal phenotype

## SUPPLEMENTARY MATERIALS

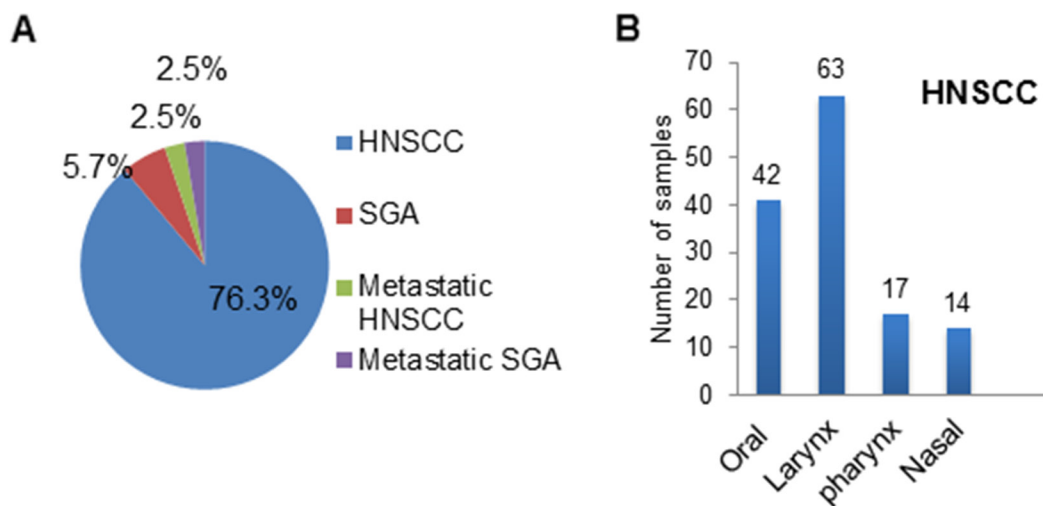

**Supplementary Figure 1: Graphical presentation of the human HNC tumor samples.** (A) Pie chart representative of the HNC tumors included in the study. (B) Graphical presentation of the HNSCC cases included in the study according to tissue of origin. HNC; Head and Neck Cancer, HNSCC; Head and Neck Squamous cell carcinoma, SGA; Salivary gland adenocarcinoma.

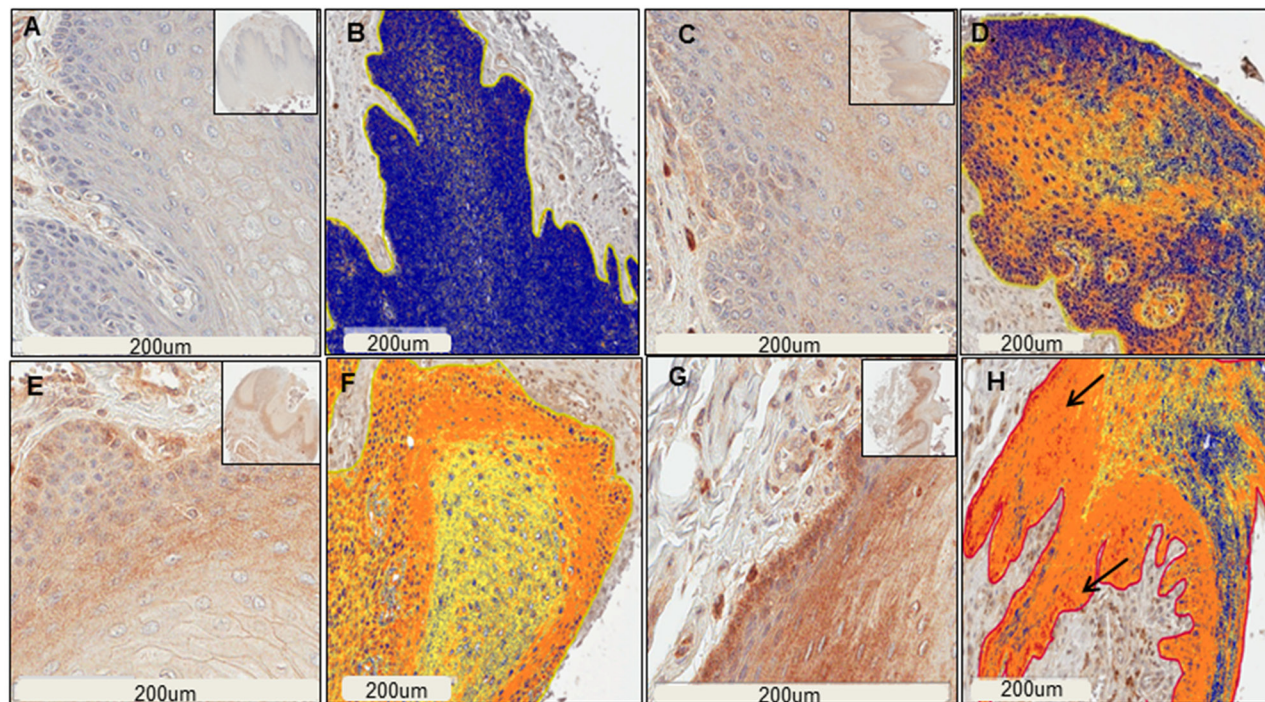

**Supplementary Figure 2: Sema4D expression in the normal epithelium and epithelial tissue adjacent to tumor margin.**

(A) Normal parakeratinized stratified squamous epithelium of the tongue is negative for Sema4D expression. (B) Digital analysis of tissue in (A) showing negative Sema4D expression (blue) through the entire thickness with only  $6 \times 10^3$  strong positive pixel intensity. (C) Parakeratinized stratified squamous epithelium showing Sema4D<sup>-ve/low</sup> expression with focal positivity in the prickle cells. The inflammatory cells in the stroma are positive for Sema4D. (D) Digital analysis of tissue in (C) shows negative (blue) to focal positive (orange) expression of the prickle cell layer with  $3.5 \times 10^4$  of strong positive pixel intensity. (E) hyperkeratotic Tongue epithelium showing focal Sema4D<sup>+ve/</sup>high expression in the parabasal cell layer. (F) Digital analysis of (E) shows diffuse weak expression (yellow) in the prickle cells, to focal positive (orange) expression in the parabasal layer with  $2 \times 10^5$  mean of strong positive pixel intensity. (G) Sema4D<sup>+ve/</sup>high in the basal and prickle cell layer of the surface epithelium (arrows). (H) Digital analysis of Sema4D staining in (G) shows high (red) expression in the basal cell layer and diffuse positive expression in the prickle cell layer with  $1.3 \times 10^6$  mean of strong positive pixel intensity. The strong positive pixel intensity presented is the mean of three annotations of each tissue section. (20x; 200µm scale, in set: 40x). Cut off for positive expression is  $(5 \times 10^5)$</sup></sup>

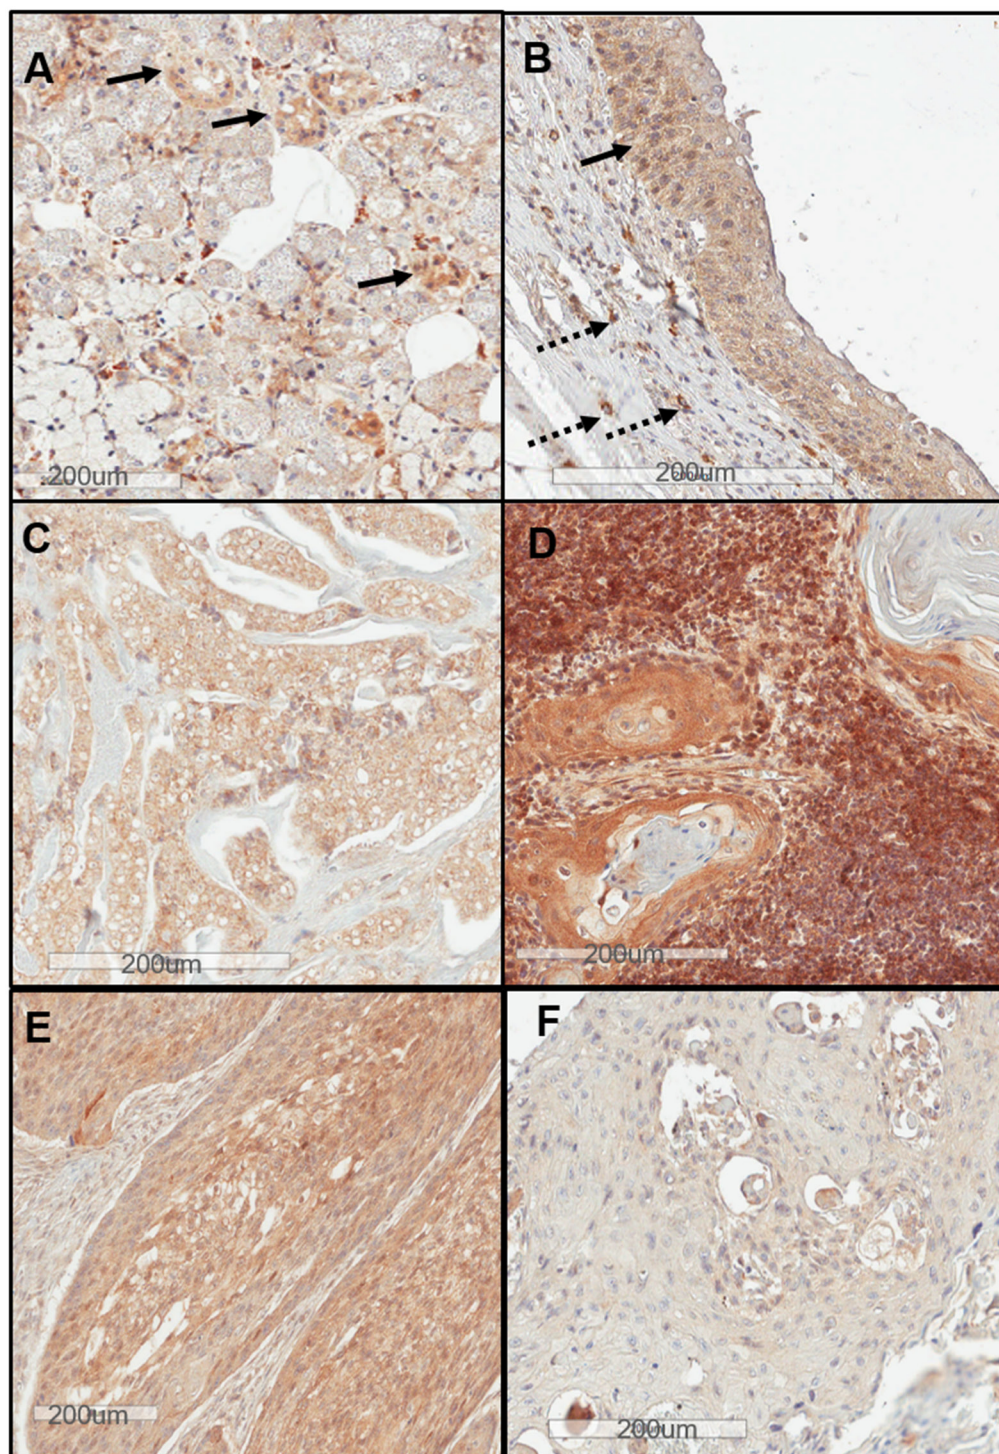

**Supplementary Figure 3: Sema4D expression in normal salivary gland tissue and epiglottis.** (A) Normal salivary gland acini and ducts. Positive expression in the ductal cells (arrows). Mucous and serous acini are negative. (B) Inflamed epiglottis shows weak positivity to Sema4D expression in the lining epithelium (arrow) and focal expression in inflammatory cells in the stroma (dotted arrow) (20x; 200µm scale). Sema4D expression in salivary adenocarcinoma and metastatic tumors. (C) Adenoid cystic carcinoma of the parotid gland shows diffuse strong Sema4D expression in tumor cells and hyalinized stroma. (D) Metastatic SCC to the lymph nodes. Tumor cells show strong Sema4D<sup>+ve/high</sup> expression as well as the inflammatory cells of the lymph node. (E) Primary laryngeal SCC stage T3N1M0, Tumor cells are Sema4D<sup>+ve/high</sup>. (F) Primary SCC of the tongue stage T1N0M0, tumor cells shows Sema4D<sup>-ve/low</sup>. (20x; 200µm scale)

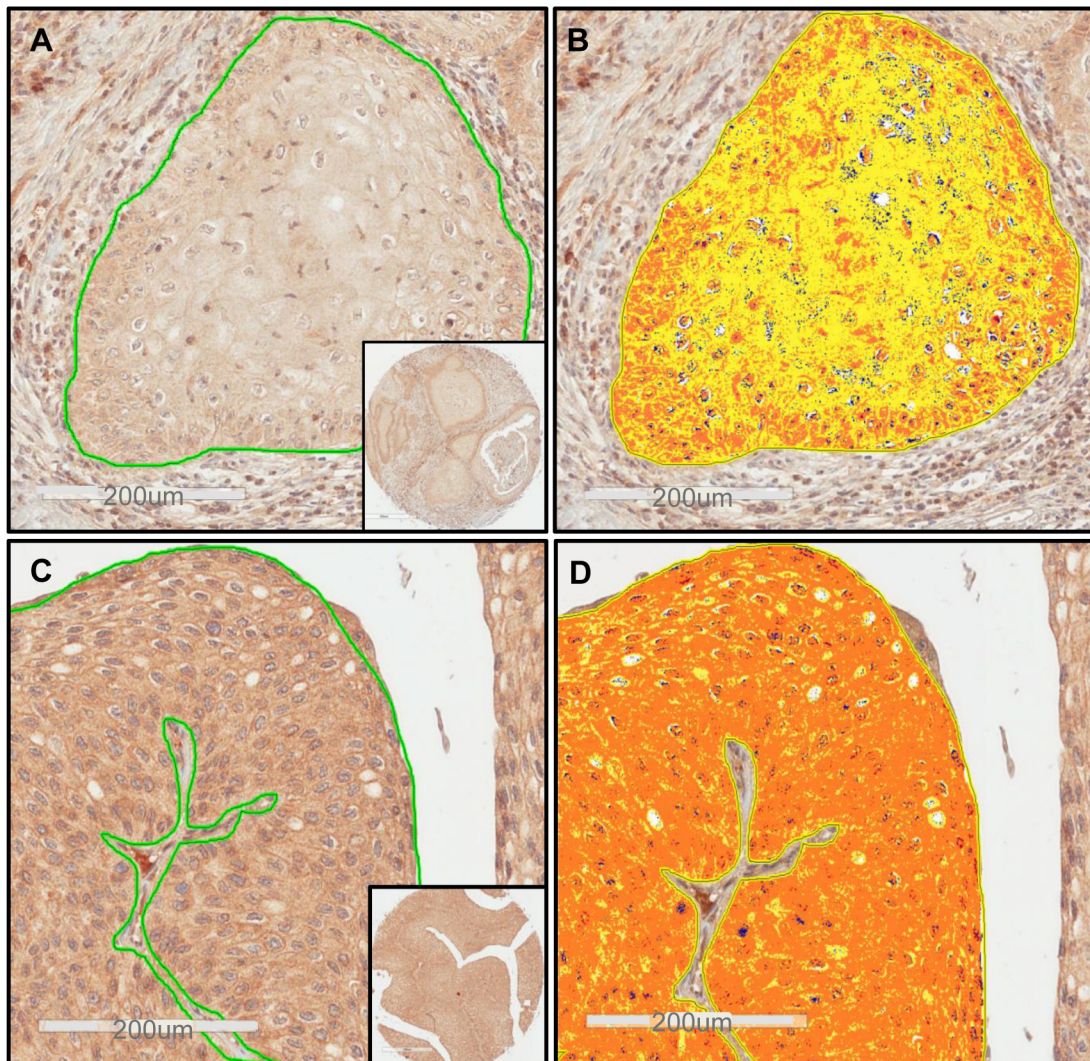

**Supplementary Figure 4: Standardization of Sema4D expression in tumor islands.** (A) Stage I SCC of the lip showing<sup>-ve/low</sup> expression of Sema4D in the annotated tumor island. (B) Digital analysis of Sema4D staining in (A) showing low expression (yellow), in the tumor cells with low level of strong positive pixel intensity of  $1.5 \times 10^5$ . (C) Stage III SCC of the left upper jaw, showing diffuse Sema4D<sup>+ve/high</sup> expression, with annotation set for digital analysis. (D) Digital analysis of Sema4D expression in (C) showed high level of strong positive pixel intensity of  $1.1 \times 10^6$ . The total intensity of strong positive pixels was calculated as the mean of three different annotations representative of the whole tumor, each annotation was analyzed under 200x magnification in an area of  $\sim 0.2 \text{ mm}^2$  (20x; 200µm scale, inset: 40x). Cut off for positive expression is ( $5 \times 10^5$ )

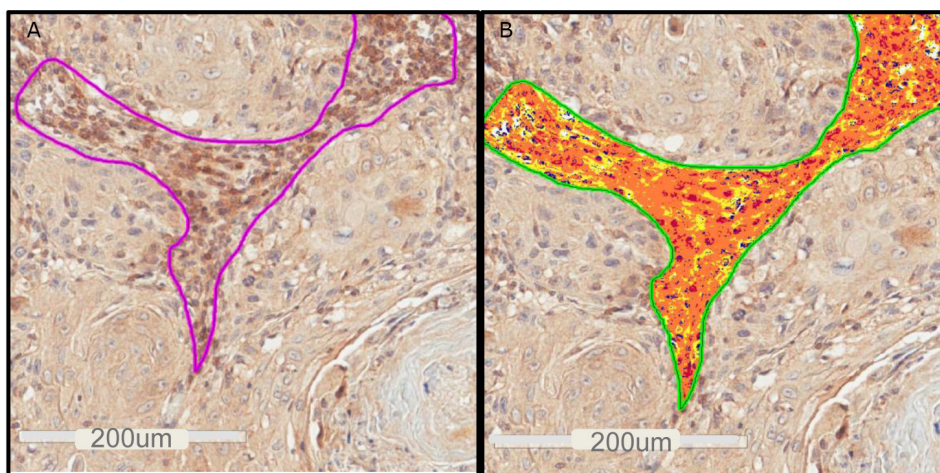

**Supplementary Figure 5: Sema4D<sup>+/ve/high</sup> TAIs.** (A) TAIs infiltrating the stroma of stage II SCC of the right palate were Sema4D<sup>+/ve/high</sup>. (B) Digital analysis shows high Sema4D expression (red) in the TAIs with 1.3x10<sup>6</sup> strong positive pixel intensity (20x; 200um scale). Cut off for positive expression is (5x10<sup>5</sup>).

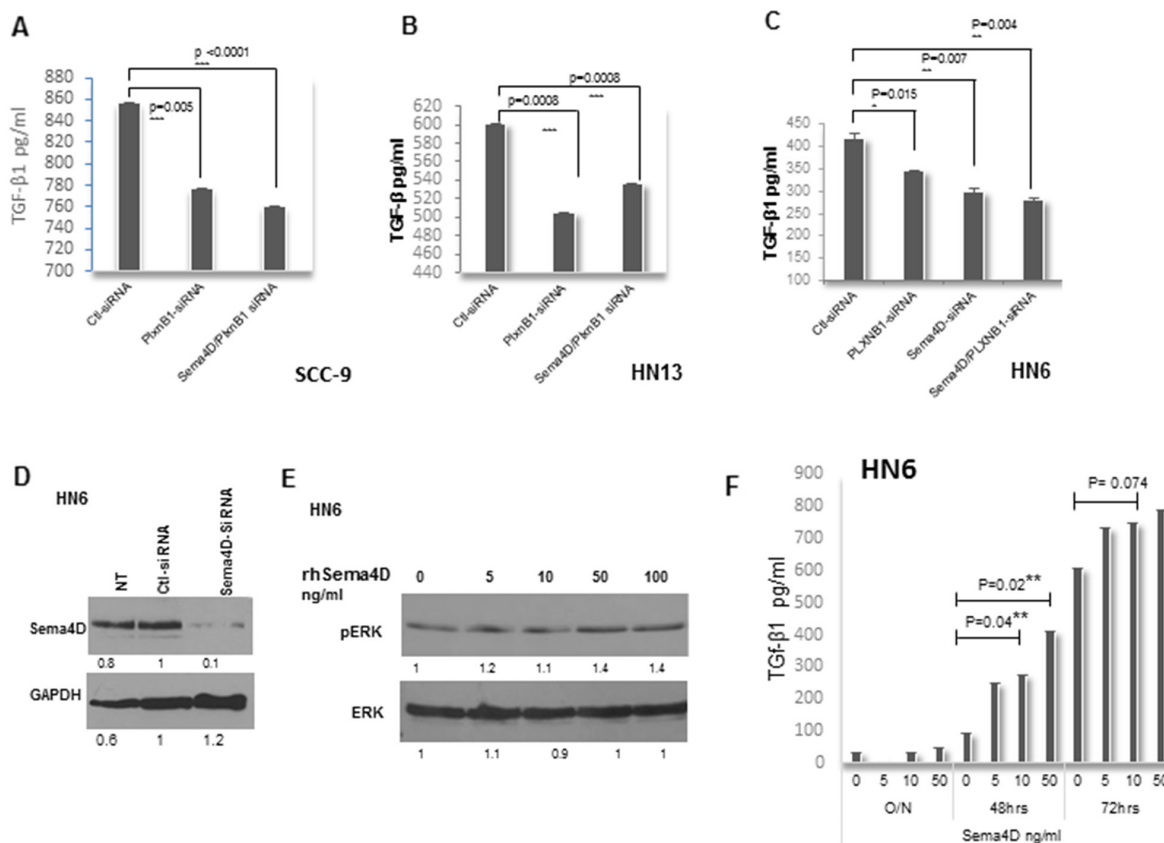

**Supplementary Figure 6: Levels of activated TGF-β1 in CM.** Decreased level of activated TGF-β1 in CM, (A) upon siRNA silencing of Plexin-B1, or combined Plexin-B1/Sema4D siRNA in SCC-9. (B) HN13 at 48hrs. (C) and HN6 at 72hrs. (D) Immunoblot of Sema4D siRNA in HN6. (E) Treatment of HN6 with rhSema4D for 20 minutes shows evidence of increased ERK phosphorylation. (F) Levels of activated TGF-β1 in CM of HN6 upon treatment with rhSema4D. TGF-β1 levels in CM starting at 48hrs. PLXNB1:Plexin-B1, rhSema4D: recombinant human Sema4D, O/N: overnight, CM: culture media. Gel band quantified using *image J*.

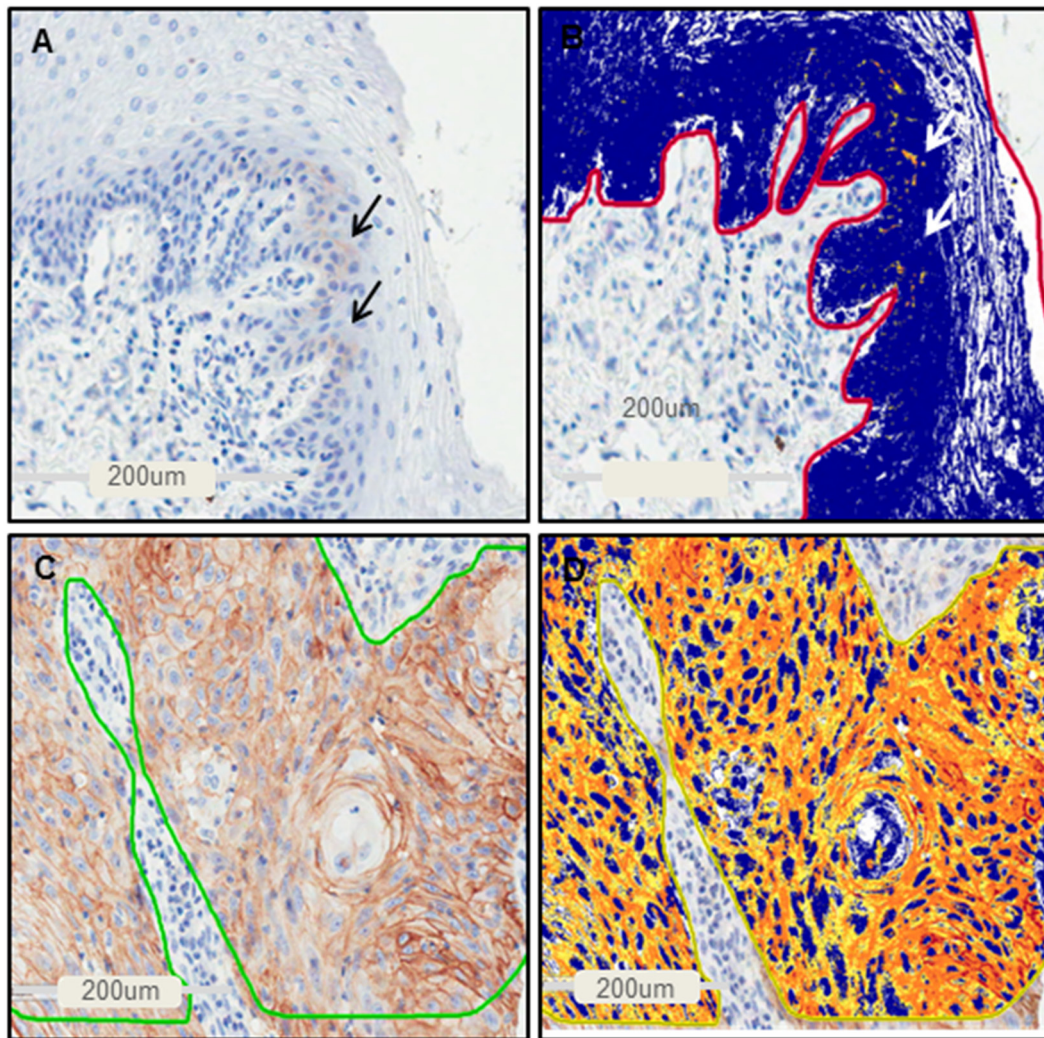

**Supplementary Figure 7: PD-L1 expression in epithelial tissue adjacent to tumor margin and in tumor cells.** (A) PD-L1 is negative in tissue adjacent to tumor margin with a focal positive area (arrows). (B) Digital analysis shows negative expression (blue) with focal positivity (arrows) (20x; 200um scale). (C) Tumor cells of stage II SCC of the right palate shows PD-L1<sup>+ve/high</sup> expression in tumor cells, TAIs are PD-L1 negative. (D) PD-L1 staining in (C) showed high level of strong positive pixel intensity of  $5.5 \times 10^6$  (20x; 200um scale).

Supplementary Table 1: Descriptive analysis of Sema4D staining according to tissue Type

| Tissue Type and distribution                      | Sema4D expression |              | Total     | P value Fisher's Exact Test, 2-sided |
|---------------------------------------------------|-------------------|--------------|-----------|--------------------------------------|
|                                                   | -ve/low (%)       | +ve/high (%) |           |                                      |
| HNSCC tumor cells                                 | 90 (66)           | 46 (34)      | 136 (100) | 0.80                                 |
| Control inflamed epithelium                       | 11 (65)           | 6 (35)       | 17 (100)  |                                      |
| <b>Total</b>                                      | 101 (66)          | 52 (34)      | 153 (100) |                                      |
| TAIs in HNSCC                                     | 49 (37)           | 82 (63)      | 131 (100) | 0.58                                 |
| Inflammatory Cells in control inflamed epithelium | 7 (47)            | 8 (53)       | 15 (100)  |                                      |
| <b>Total</b>                                      | 56 (38)           | 90 (62)      | 146 (100) |                                      |

Supplementary Table 2: Sema4D expression in tumor cells in correlation to Patient's demographics and histological grade

|                       | Sema4D expression in tumor cells |                 | Total     | P value |
|-----------------------|----------------------------------|-----------------|-----------|---------|
|                       | -ve/low No (%)                   | +ve/high No (%) |           |         |
| <b>Age</b>            | 90 (66)                          | 46 (34)         | 136 (100) | 0.31    |
| Median (Range)        | 57 (12-90)                       | 59 (42-83)      |           |         |
| <b>Gender</b>         |                                  |                 |           | 0.78    |
| F                     | 14 (64)                          | 8 (36)          | 22 (16)   |         |
| M                     | 76 (67)                          | 38 (33)         | 114 (34)  |         |
| Total                 | 90 (66)                          | 46 (34)         | 136 (100) |         |
| <b>Location</b>       |                                  |                 |           | 0.03    |
| Oral cavity           | 34 (83)                          | 7 (17)          | 41 (30)   |         |
| Pharynx               | 8 (47)                           | 9 (53)          | 17 (13)   |         |
| Larynx                | 40 (63)                          | 23 (37)         | 63 (47)   |         |
| Nasal cavity          | 8 (57)                           | 6 (43)          | 14 (10)   |         |
| Total                 | 90 (67)                          | 45 (33)         | 135 (100) |         |
| <b>SCC Hist grade</b> |                                  |                 |           | 0.15    |
| 1                     | 34 (72)                          | 13 (28)         | 47 (35)   |         |
| 2                     | 33 (57)                          | 25 (43)         | 58 (44)   |         |
| 3                     | 21 (75)                          | 7 (25)          | 28 (21)   |         |
| Total                 | 88 (66)                          | 45 (34)         | 133 (100) |         |

Supplementary Table 3: Sema4D<sup>+ve/high</sup> TAIs in correlation to Patients' demographics and clinical staging

|                         | TAIs expressing Sema4D |                | Total     | P value |
|-------------------------|------------------------|----------------|-----------|---------|
|                         | -ve/low N (%)          | +ve/high N (%) |           |         |
| <b>Age</b>              | 49 (37)                | 83 (63)        | 132 (100) |         |
| Median (range)          | 56 (41-90)             | 57 (12-81)     |           | 0.57    |
| <b>Gender</b>           |                        |                |           |         |
| M                       | 43 (38)                | 69 (62)        | 112 (85)  | 0.47    |
| F                       | 6 (30)                 | 14 (70)        | 20 (15)   |         |
| Total                   | 49 (37)                | 83 (62)        | 132 (100) |         |
| <b>Location</b>         |                        |                |           |         |
| Oral Cavity             | 11 (29)                | 27 (71)        | 38 (29)   | 0.58    |
| Larynx                  | 26 (41)                | 37 (59)        | 63 (48)   |         |
| Pharynx                 | 5 (31)                 | 11 (69)        | 16 (12)   |         |
| Nasal cavity            | 6 (43)                 | 8 (57)         | 14 (11)   |         |
| Total                   | 48 (37)                | 83 (63)        | 131 (100) |         |
| <b>Grade</b>            |                        |                |           |         |
| 1                       | 14 (31)                | 31 (69)        | 45 (35)   | 0.35    |
| 2                       | 21 (37)                | 36 (63)        | 57 (44)   |         |
| 3                       | 13 (48)                | 14 (52)        | 27 (21)   |         |
| Total                   | 48 (37)                | 81 (63)        | 129 (100) |         |
| <b>Tumor stage</b>      |                        |                |           |         |
| I+II                    | 19 (34)                | 37 (66)        | 56 (43)   | 0.68    |
| III                     | 14 (37)                | 24 (63)        | 38 (30)   |         |
| IV                      | 15 (43)                | 20 (57)        | 35 (27)   |         |
| Total                   | 48 (37)                | 81 (63)        | 129 (100) |         |
| <b>Nodal metastasis</b> |                        |                |           |         |
| Yes                     | 15 (42)                | 21 (58)        | 36 (28)   | 0.51    |
| No                      | 33 (35)                | 60 (65)        | 93 (72)   |         |
| Total                   | 48 (37)                | 81 (63)        | 129 (100) |         |



Supplementary Table 4: Descriptive analysis of PD-L1 staining according to tissue type

| Type                                 | PD-L1 expression |                 | Total     | P value Fisher's Exact Test, 2-sided |
|--------------------------------------|------------------|-----------------|-----------|--------------------------------------|
|                                      | -ve/low No (%)   | +ve/high No (%) |           |                                      |
| HNSCC tumor cells                    | 99 (73)          | 36 (27)         | 135 (89)  | 0.07                                 |
| Normal/Inflamed epithelium           | 16 (94)          | 1 (6)           | 17 (11)   |                                      |
| Total                                | 115 (76)         | 37 (24)         | 152 (100) |                                      |
| <b>HNSCC tumor cells and/or TAIs</b> | 86 (64)          | 49 (36)         | 135 (89)  | 0.01                                 |
| Normal/Inflamed epithelium           | 16 (94)          | 1 (6)           | 17 (11)   |                                      |
| Total                                | 102 (67)         | 50 (33)         | 152 (100) |                                      |

Supplementary Table 5: Total PD-L1 expression in correlation to patients' demographics

|                           | PD-L1 expression in tumor tissue |                | Total     | P-value |
|---------------------------|----------------------------------|----------------|-----------|---------|
|                           | -ve/low N (%)                    | +ve/high N (%) |           |         |
| <b>Age</b>                | 86 (63)                          | 49 (37)        | 135 (100) | 0.15    |
| Median (range)            | 57 (12-83)                       | 60 (38-90)     |           |         |
| <b>Gender</b>             |                                  |                |           | 0.80    |
| Males                     | 70 (63)                          | 42 (37)        | 112 (84)  |         |
| Females                   | 15 (68)                          | 7 (32)         | 22 (16)   |         |
| Total                     | 85 (63)                          | 49 (37)        | 134 (100) |         |
| <b>Location</b>           |                                  |                |           | 0.25    |
| Oral cavity               | 23 (56)                          | 18 (44)        | 41 (31)   |         |
| Larynx                    | 40 (65)                          | 22 (35)        | 62 (46)   |         |
| Pharynx                   | 10 (59)                          | 7 (41)         | 17 (13)   |         |
| Nasal cavity              | 12 (86)                          | 2 (14)         | 14 (10)   |         |
| Total                     | 85 (63)                          | 49 (37)        | 134 (100) |         |
| <b>Pathological grade</b> |                                  |                |           | 0.46    |
| 1                         | 31 (67)                          | 15 (33)        | 46 (35)   |         |
| 2                         | 37 (65)                          | 20 (35)        | 57 (44)   |         |
| 3                         | 15 (54)                          | 13 (46)        | 28 (21)   |         |
| Total                     | 83 (63)                          | 48 (37)        | 131 (100) |         |
